# Supplementary material for: Taxonomic and Bioactivity Characterizations of Mameliella alba Strain LZ-28 Isolated from Highly Toxic Marine Dinoflagellate Alexandrium catenella LZT09
Source: Mar Drugs. 2022 May 12;20(5):321. doi: 10.3390/md20050321 (PMC9147911; doi:10.3390/md20050321)

# **Taxonomic and Bioactivity Characterizations of Mameliella alba Strain LZ-28 Isolated from Highly Toxic Marine Dinoflagellate *Alexandrium catenella* LZT09**

**Cheng-Zhe Ren <sup>1</sup>, Hui-Min Gao <sup>1</sup>, Jun Dai <sup>2</sup>, Wen-Zhuo Zhu <sup>1</sup>, Fei-Fei Xu <sup>3</sup>, Yun Ye <sup>4</sup>,  
Xiao-Ling Zhang <sup>1,5,\*</sup> and Qiao Yang <sup>1,5,\*</sup>**

<sup>1</sup> Department of Marine Chemistry, College of Marine Science and Technology, Zhejiang Ocean University, Zhoushan 316022, China; renchengzhe@zjou.edu.cn (C.-Z.R.); gaohuimin@zjou.edu.cn (H.-M.G.);  
zhuwenzhuo@zjou.edu.cn (W.-Z.Z.)

<sup>2</sup> Natural “111” Center for Cellular Regulation and Molecular Pharmaceutics, Key Laboratory of Fermentation Engineering, Ministry of Education, College of Bioengineering, Hubei University of Technology, Wuhan 430068, China; jundai@hbut.edu.cn

<sup>3</sup> Zhejiang Yimeiyuan Testing Technology Co., Ltd., Zhoushan 316022, China; smexu713@163.com

<sup>4</sup> Zhoushan Natural Resources Surveying and Mapping Design Centre, Zhoushan 316021, China; smeye918@gmail.com

<sup>5</sup> ABI Group, Zhejiang Ocean University, Zhoushan 316022, China

**\* Correspondences:** zhangxiaoling@zjou.edu.cn (X.-L.Z.); qiaoyang1979@whu.edu.cn (Q.Y.)

Heatmap showing Average Nucleotide Identity (ANI) between *Mameiliella* strains. The color scale ranges from 0.98 (light blue) to 1.0 (dark blue). The strains are: *Mameiliella* sp. LZ-28, *Mameiliella* alba KD53, *Mameiliella* alba JLT354-WT, *Mameiliella* alba JL351, *Mameiliella* alba L6M1-5, *Mameiliella* alba F15, *Mameiliella* alba Ep20, *Mameiliella* alba KU6B, *Mameiliella* alba UMTAT08, and *Mameiliella* alba PBVC088. The heatmap shows high ANI values (dark blue) for *Mameiliella* sp. LZ-28 and *Mameiliella* alba PBVC088, and lower values (light blue) for other strains.

ANI

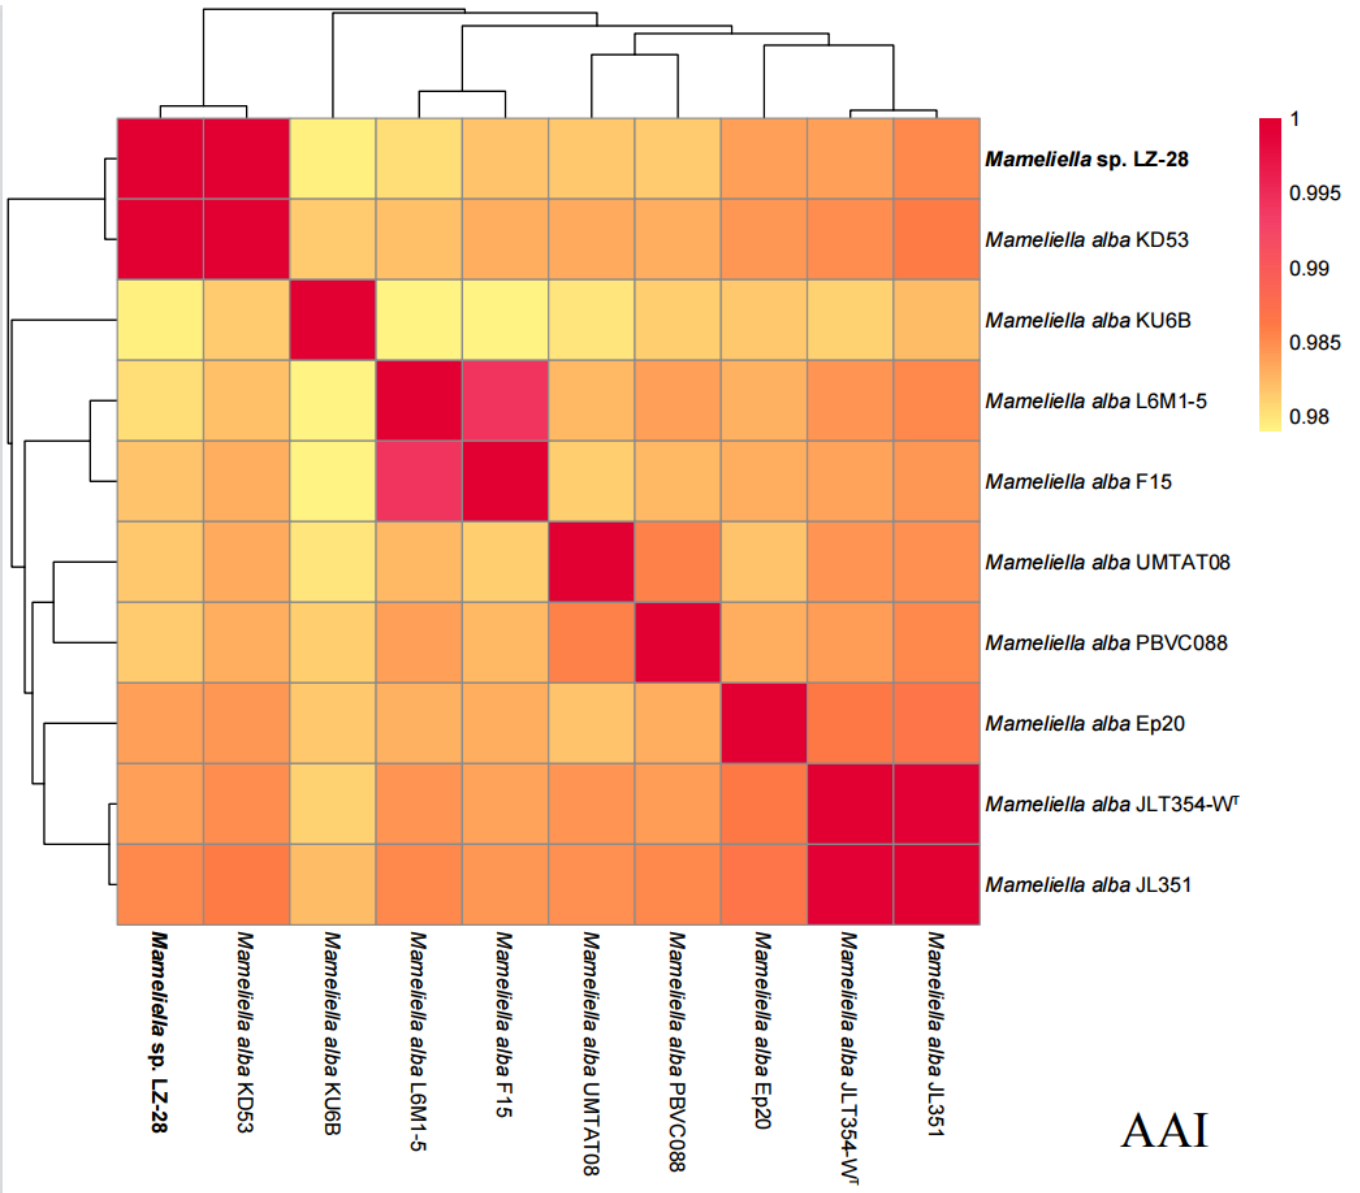

AAI

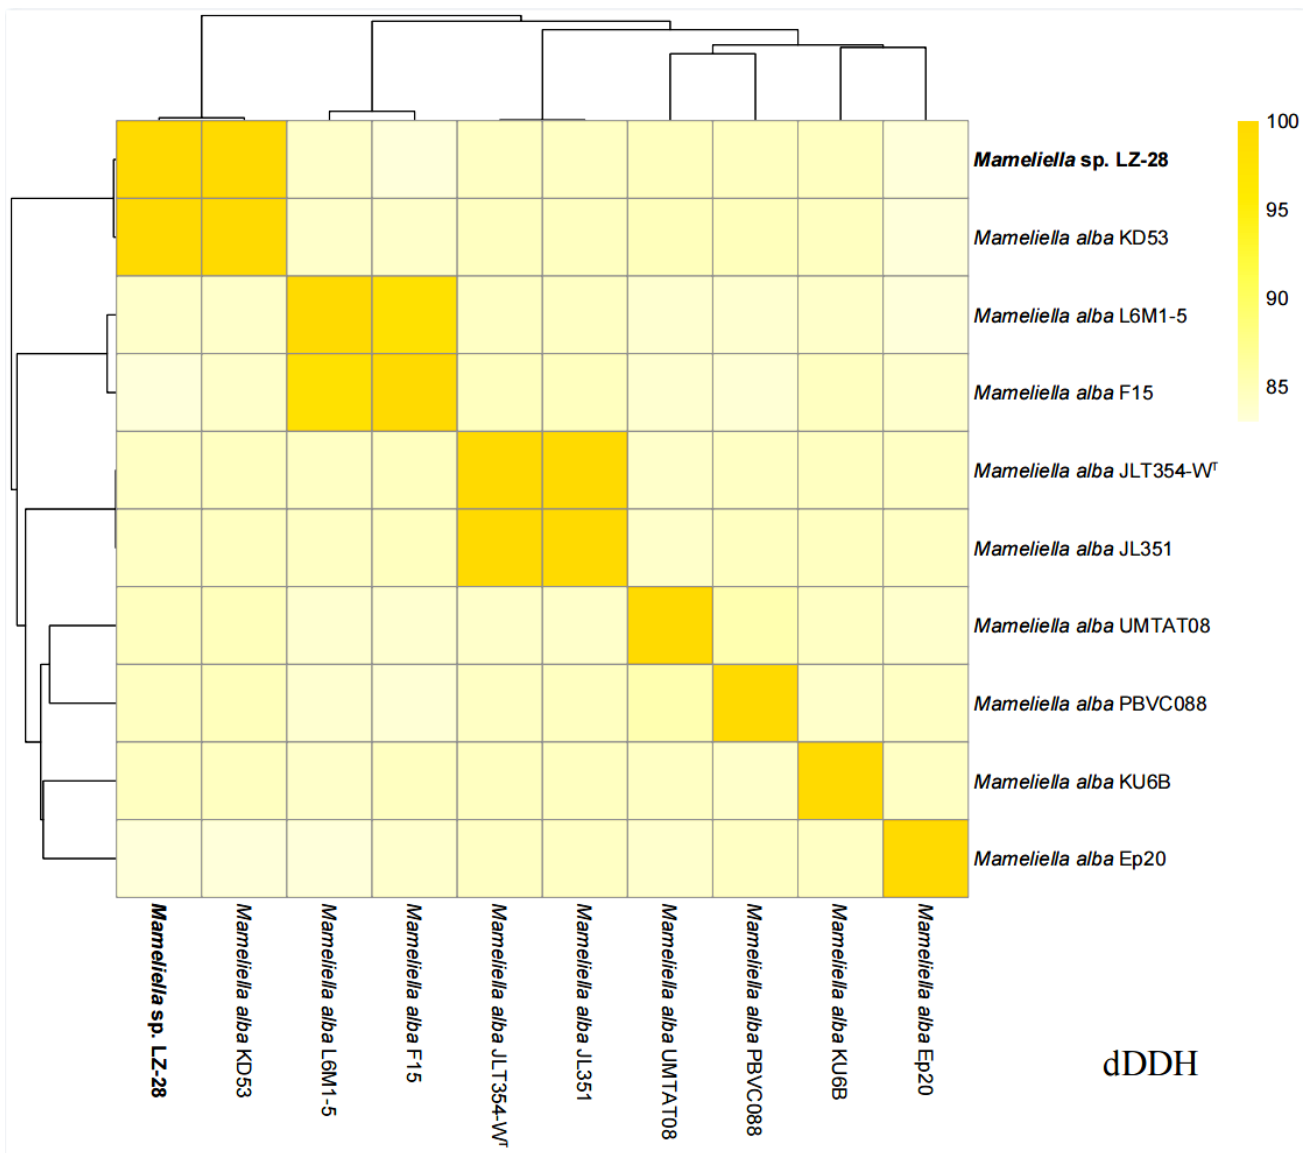

**Figure S2.** Comparison of the COG and KEGG categories among the ten selected *M. alba* strains. The functional genes of the core and unique groups distributed by COG database were shown in pane A and B, respectively. The pane C and D represented the distribution of the core genes and unique genes annotated by KEGG database, respectively. The sizes of the circles in each pane were proportional to the numbers of the different COG or KEGG categories. The strains isolated from marine algae were marked with green.

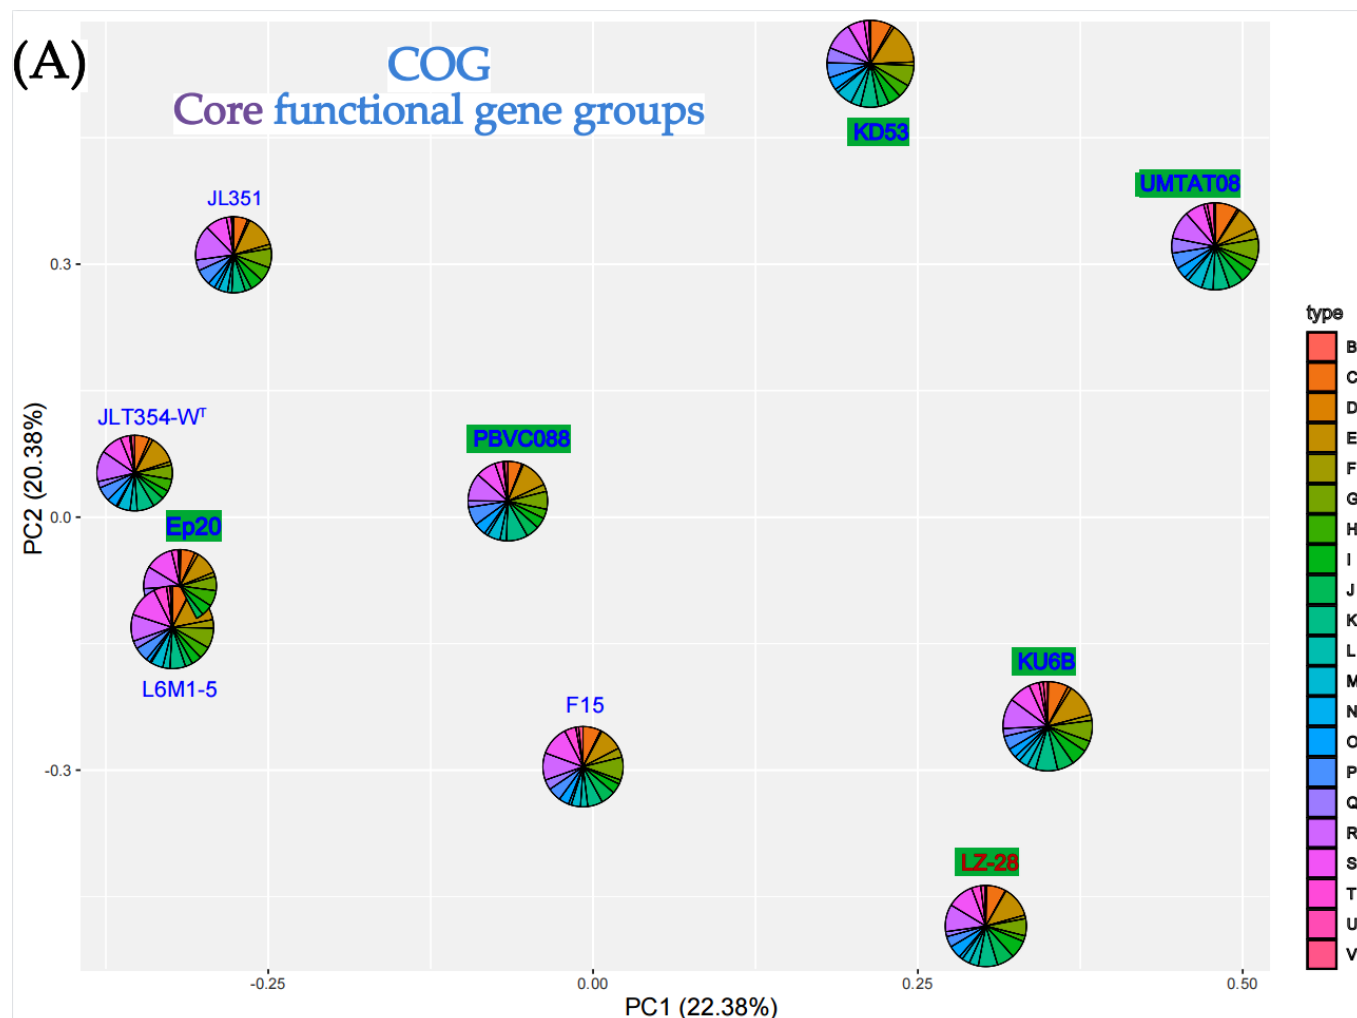

(B)

COG  
unique functional gene groups

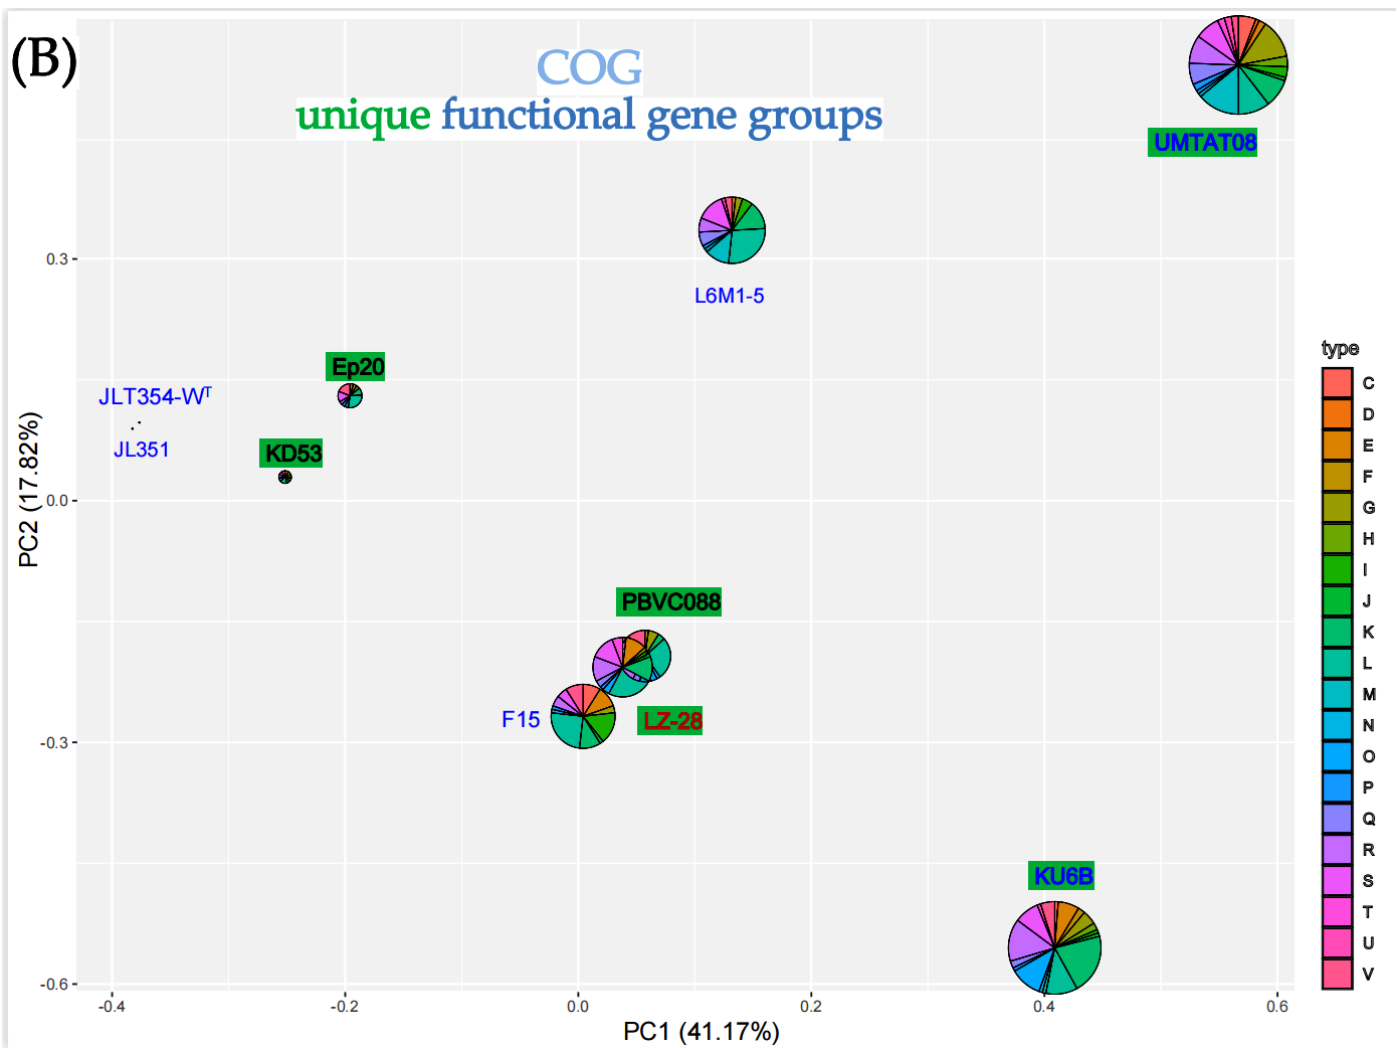

(C)

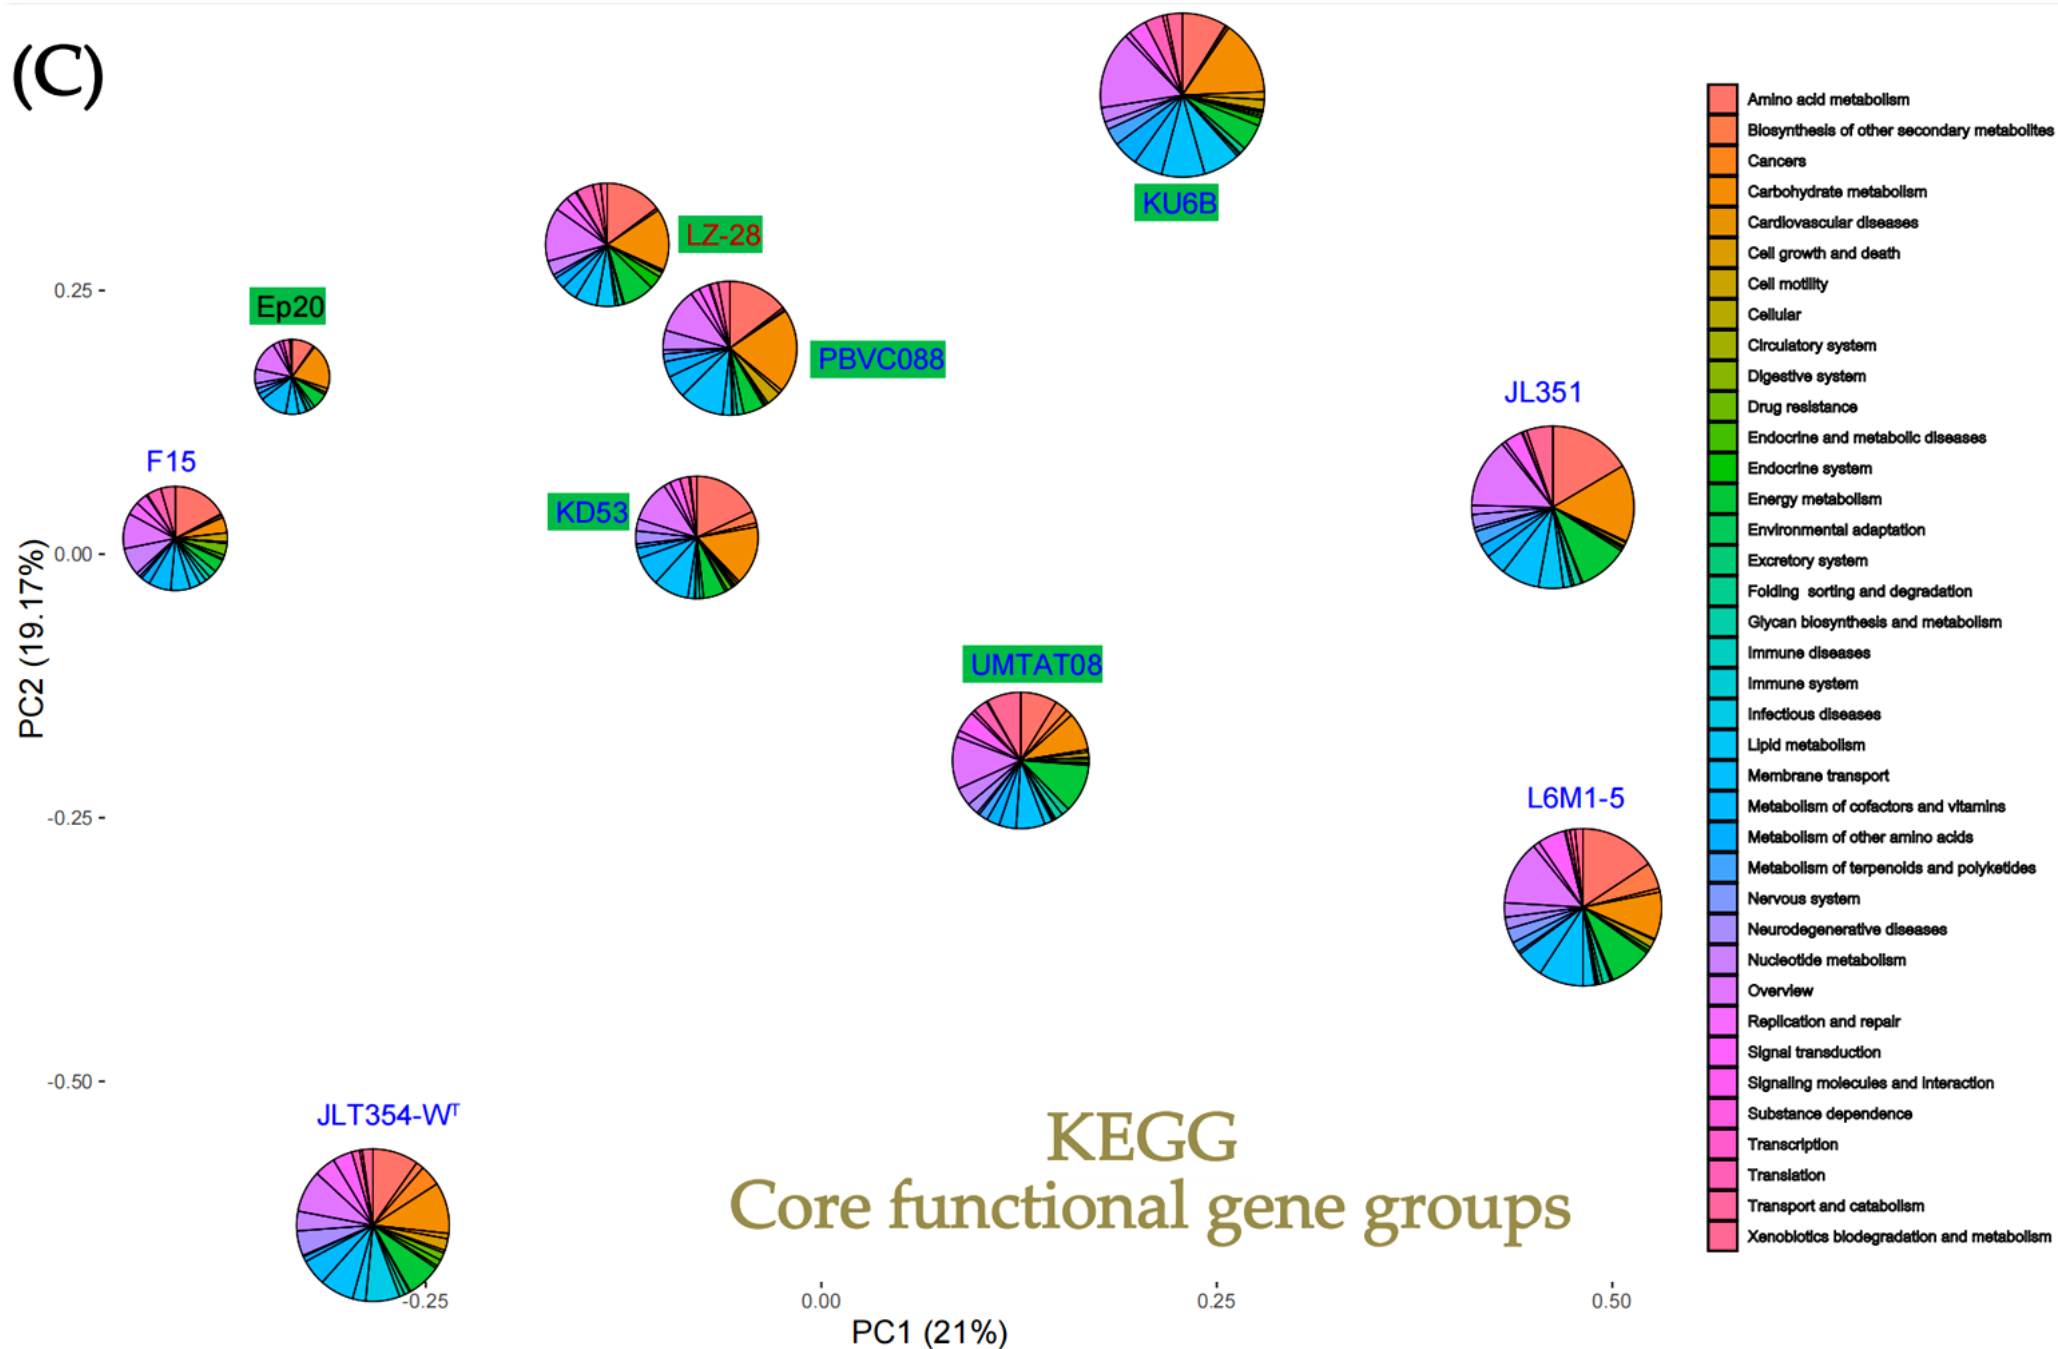

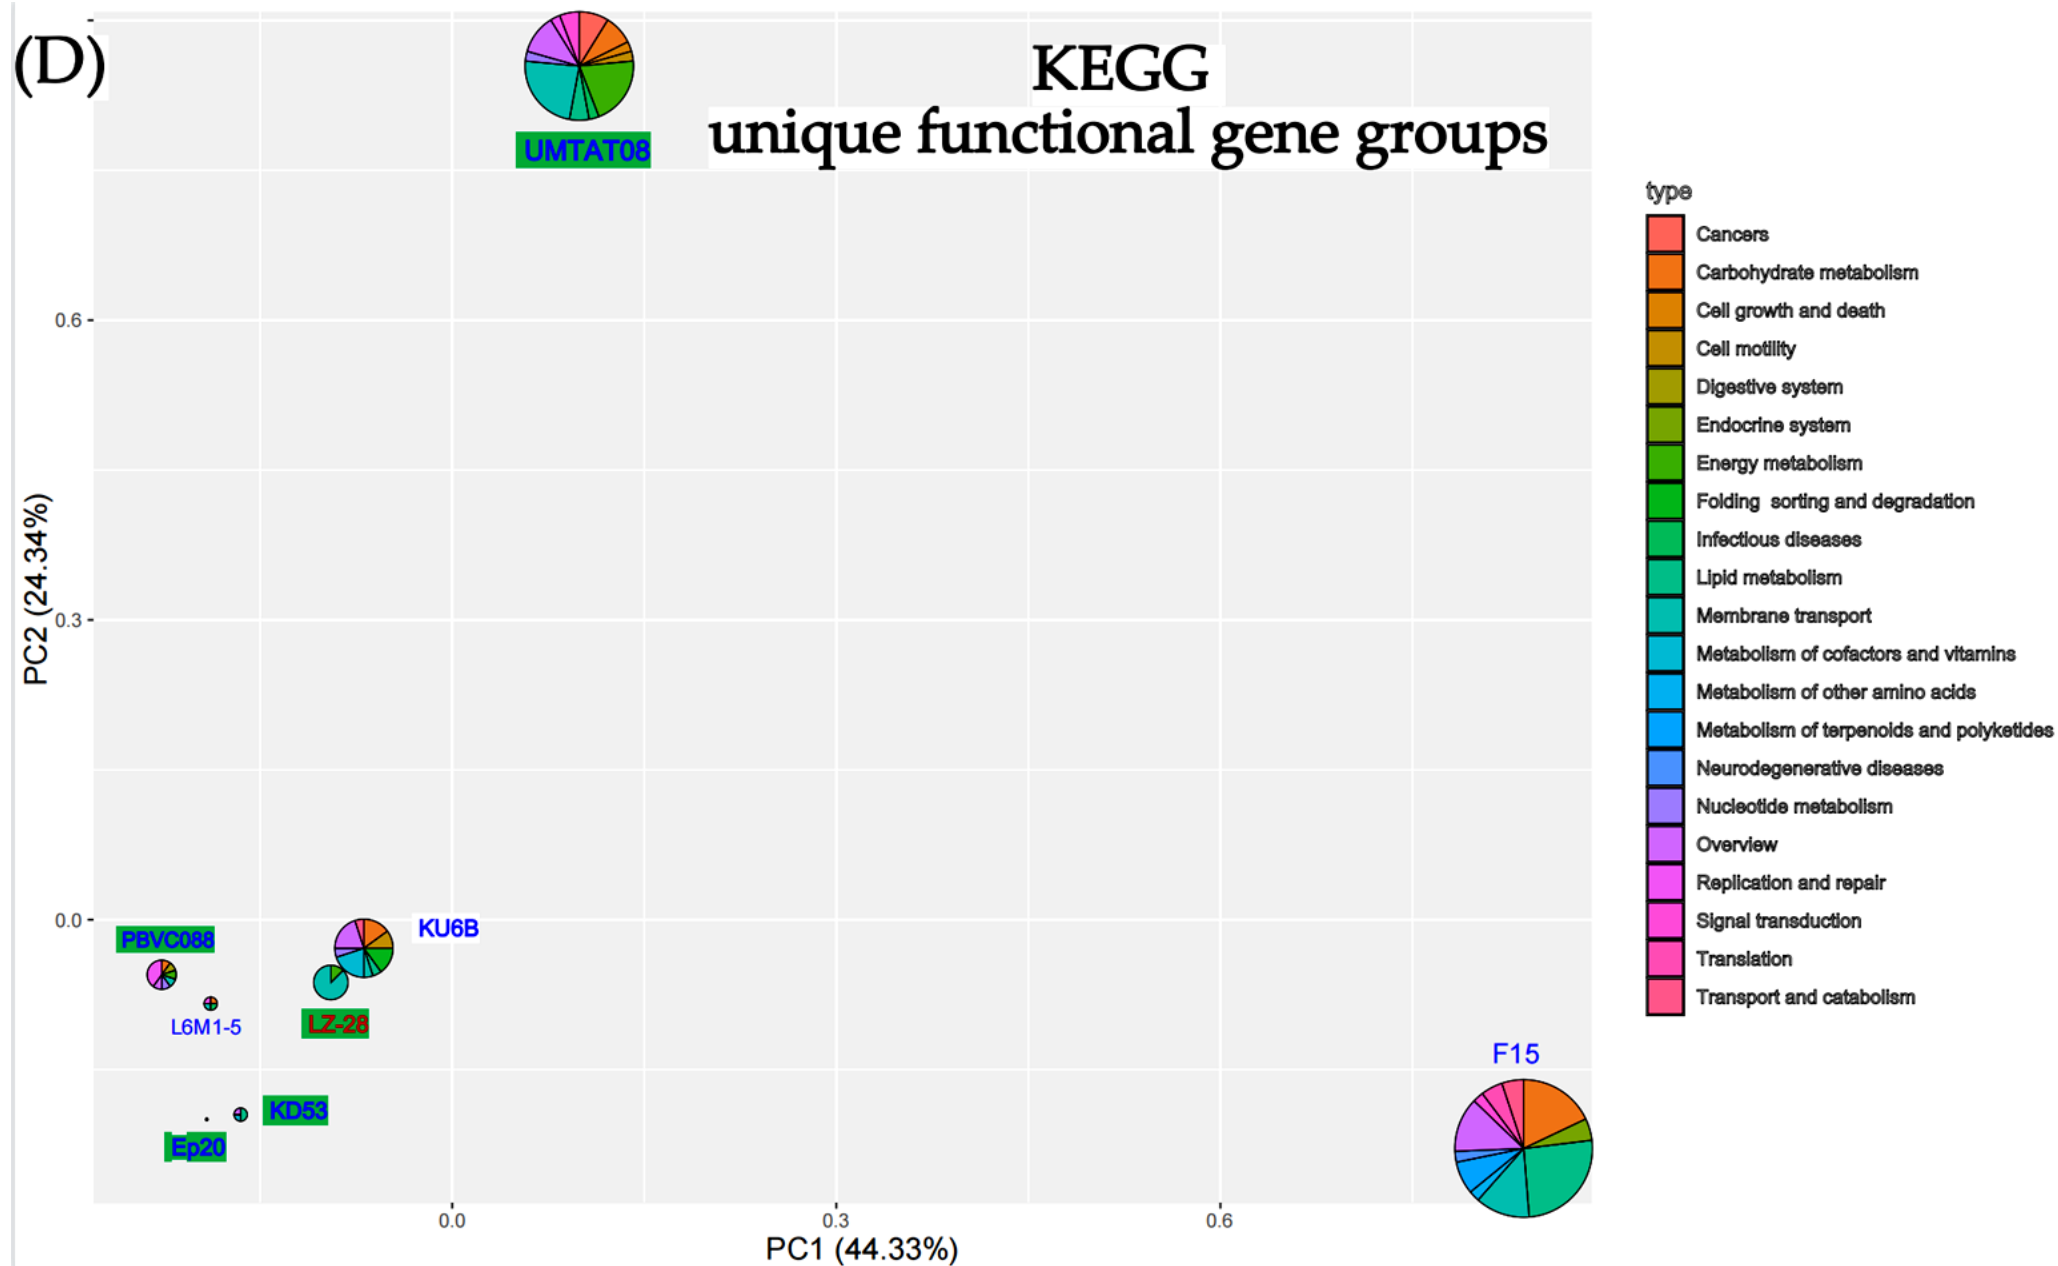

Supplement: Supplementary file 1 [file marinedrugs-20-00321-s001.zip › marinedrugs-1692039-supplementary.pdf]
